# Supplementary material for: Solid acids with SO3H groups and tunable surface properties: versatile catalysts for biomass conversion
Source: Royal Society of Chemistry journal article supplement (doi:10.1039/c4ta02320j), 2014-01-01
Supplement: c4ta02320j1.pdf [file c4ta02320j1.pdf]

## Supporting Information

### Solid acids with SO<sub>3</sub>H groups and tunable surface properties: versatile catalysts for biomass conversion

Patrícia A. Russo, Margarida M. Antunes, Patrícia Neves, Paul V. Wiper, Enza Fazio, Fortunato Neri, Francesco Barreca, Luís Mafra, Martyn Pillinger, Nicola Pinna and Anabela A. Valente

#### 1. TGA curves of the prepared materials

Thermogravimetric analysis of the composites showed that the carbon starts to thermally degrade above 275-300 °C, and is completely decomposed at 600-650 °C (Figure S1, SI). The onset temperature of the major weight loss in the TGA curves of the samples, associated with the degradation of the carbon, depends on the sample. For samples CST-0 and CST-0.1, this temperature is above 300 °C, while it decreases down to 276 °C for CST-1 probably because the latter has a higher amount of surface acid sites that may lead to autocatalytic decomposition of the carbon. This effect has been observed before for carbons with high contents of surface functionalities.<sup>1,2</sup>

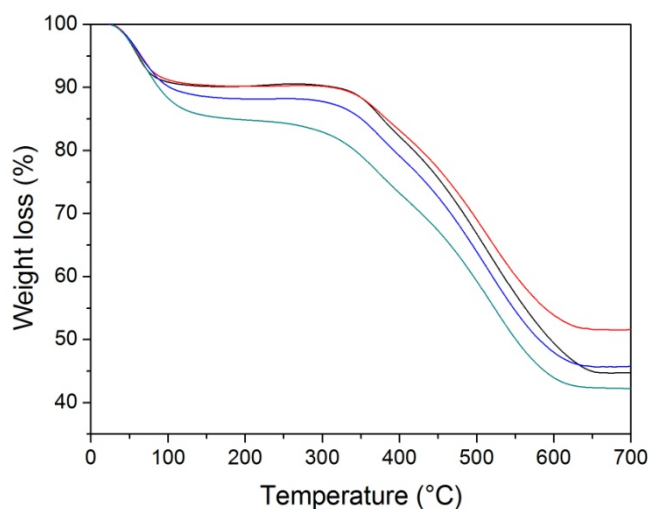

**Figure S1.** Thermogravimetric curves in air of the composite materials CST-0 (black), CST-0.1 (red), CST-0.4 (blue) and CST-1 (green).

## 2. N<sub>2</sub> adsorption-desorption isotherm of the silica support and composites

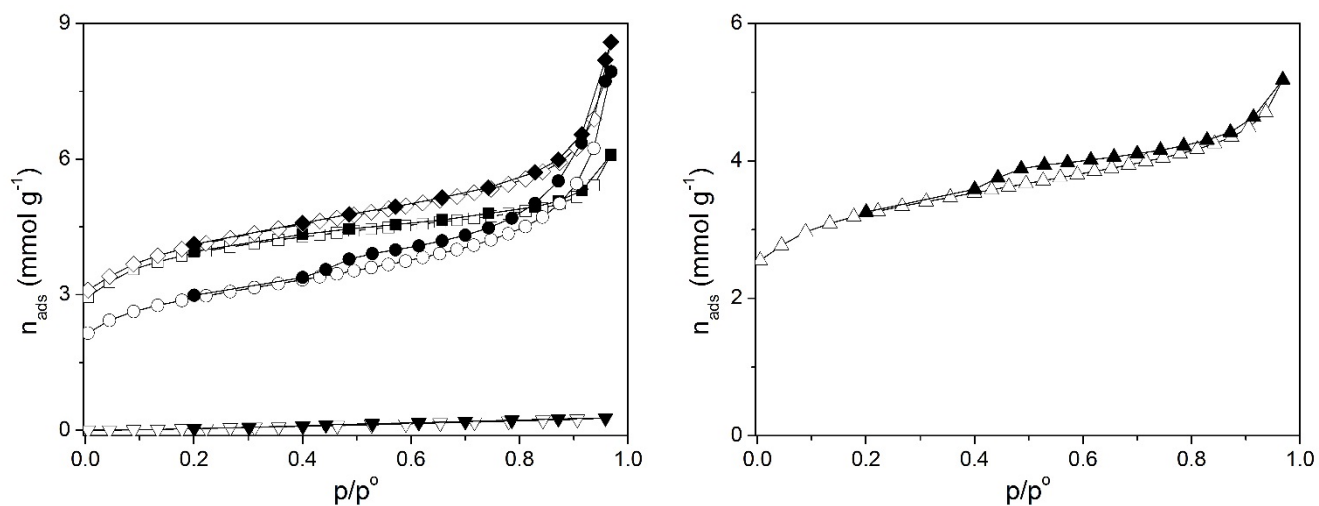

**Figure S2.** Nitrogen adsorption-desorption isotherms, at -196 °C, of CST-0.1 ( $\diamond$ ), CST-0 ( $\square$ ), CST-0.4 ( $\Delta$ ), CST-1 ( $\circ$ ) and CT-1 ( $\nabla$ ) (open symbols-adsorption; closed symbols-desorption).

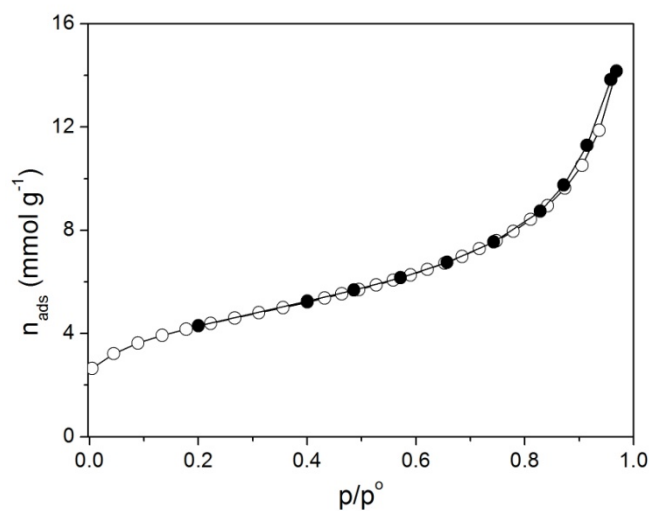

**Figure S3.** Nitrogen adsorption-desorption isotherm at -196 °C of the commercial silica used to synthesize the composites. The silica used as support is non-porous ( $A_{\text{BET}}=346 \text{ m}^2 \text{ g}^{-1}$ ).

### 3. Powder X-ray diffraction patterns of the prepared materials

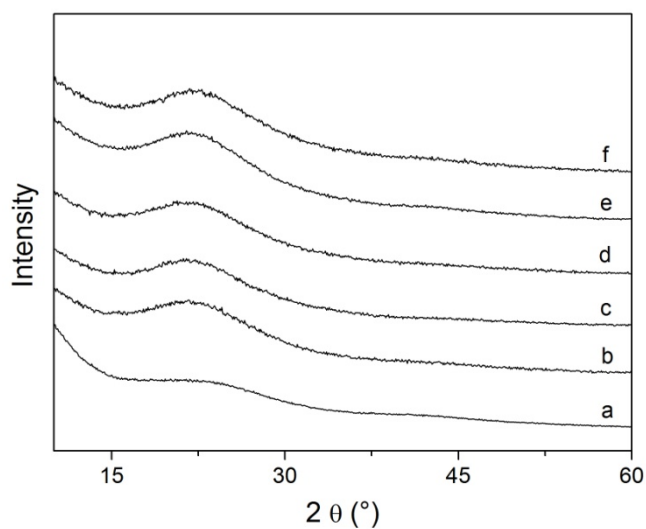

**Figure S4.** Powder X-ray diffraction patterns of a) CT-1, b) CST-0-600, c) CST-0, d) CST-0.1, e) CST-0.4 and f) CST-1.

### 4. Raman spectra of selected CST materials

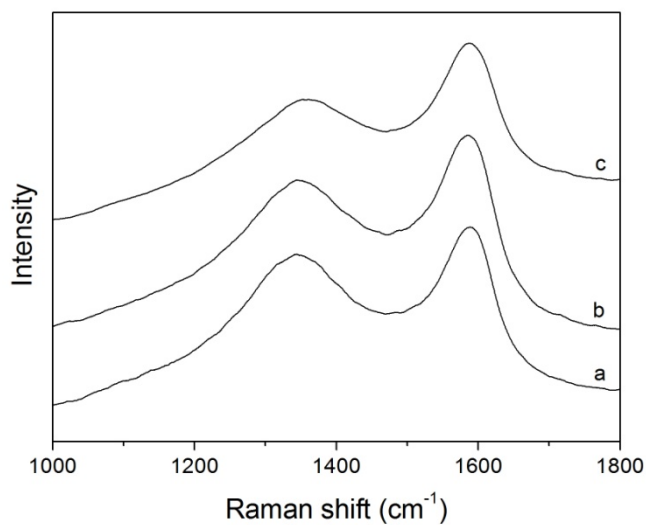

**Figure S5.** Raman spectra of a) CST-0-600, b) CST-0 and c) CST-1.

## 5. FT-IR spectra of the silica support and CST-0-600

The spectrum of the pristine silica exhibits bands at 1101 and 808  $\text{cm}^{-1}$  associated with the stretching of the Si-O-Si bonds, and a band at 468  $\text{cm}^{-1}$  attributed to the bending of Si-O-Si bonds. The band at 970  $\text{cm}^{-1}$  corresponds to the bending of silanol bonds Si-O-H.

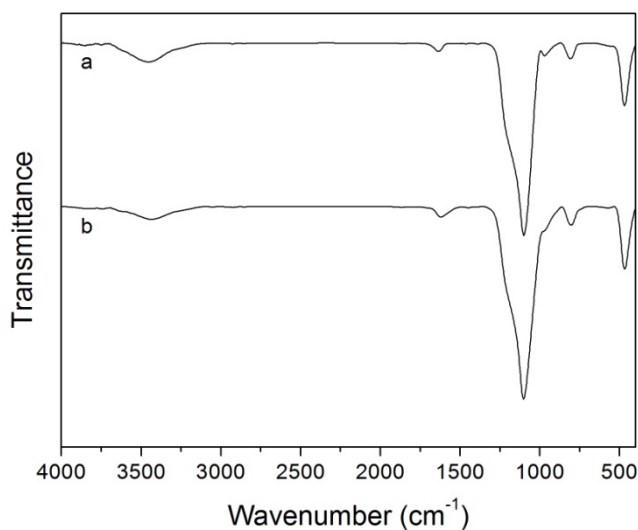

**Figure S6.** FT-IR spectra of the a) silica support and b) CST-0-600.

## 6. <sup>13</sup>C CP MAS NMR

The <sup>1</sup>H-<sup>13</sup>C CP MAS spectrum of CST-nc/a exhibits very sharp, well-defined resonances. The peaks between 144 and 125 ppm arise from the nonequivalent aromatic carbons of the TsOH molecule, in particular the resonance at 139 ppm is assigned to the aromatic carbons bonded to the -SO<sub>3</sub>H groups. The resonance at 21.5 ppm corresponds to the aliphatic carbon in the compound.

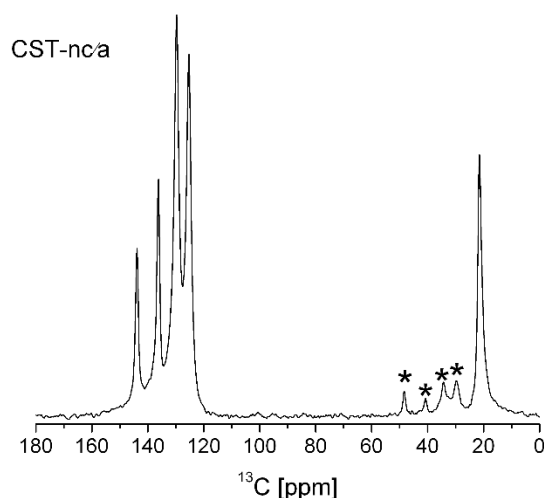

**Figure S7.** <sup>13</sup>C CP MAS NMR spectrum of CST-nc/a. Spinning sidebands are labeled with asterisks.

The spectra of the carbonized/activated materials are considerably different and exhibit much broader resonances (Figure S8), which is consistent with the disordered nature of these materials. The  $^{13}\text{C}$  NMR spectra of the CT-1, CST-1 and CST-0 materials display essentially three regions at ca. 139, 129 and 20 ppm with varying levels of intensities. The resonance at 129 ppm is assigned to polycyclic aromatic carbons and/or to those adjacent to sulfonic acid groups; that at 20 ppm corresponds to the methyl group within the precursor molecule.<sup>15,22</sup> The spectrum of CT-1 shows a resonance at 150 ppm assigned to phenolic OH groups. The spectra of CST-1, CST-0-600 and CT-1 show much weaker resonances at 20 ppm in comparison to the resonance at 129 ppm than the spectrum of CST-0. These results suggest that pyrolysis was more extensive for the former materials, which is in agreement with the FT-IR data discussed above. Nevertheless, activation has important advantages compared to carbonization at 600 °C, such as the lower synthesis temperature and much better retention of the sulfur-containing groups.

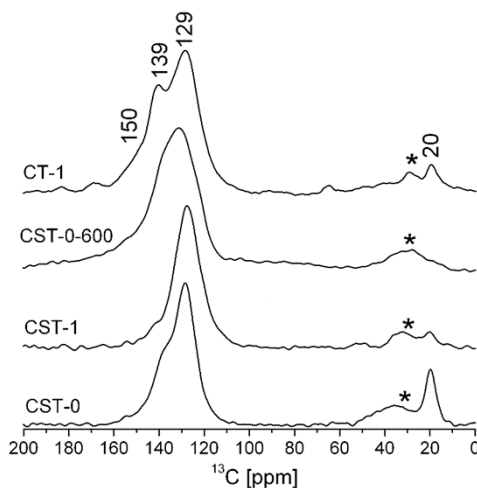

**Figure S8.**  $^1\text{H}$ - $^{13}\text{C}$  CP MAS spectra of prepared materials (sidebands are marked with an asterisk).

## 7. High resolution XPS of the prepared composite materials

**Table S1.** Relative percentage of S-containing functional groups obtained by fitting the S 2p XPS spectra.

| <b>Sample</b>  | <b>SH</b> | <b>SO<sub>3</sub>H</b> | <b>SH/SO<sub>3</sub>H</b> |
|----------------|-----------|------------------------|---------------------------|
| <b>CST-0</b>   | 40.04     | 59.96                  | 0.67                      |
| <b>CST-0.1</b> | 51.06     | 48.94                  | 1.04                      |
| <b>CST-0.4</b> | 36.97     | 63.03                  | 0.59                      |
| <b>CST-1</b>   | 18.03     | 81.97                  | 0.22                      |

**Table S2.** Relative percentage of functional groups obtained by fitting the C 1s XPS spectra.

| <b>Sample</b>  | <b>C-C</b> | <b>C-O</b> | <b>C=O</b> | <b>COOH</b> |
|----------------|------------|------------|------------|-------------|
| <b>CST-0</b>   | 87.07      | 10.06      | 1.85       | 1.01        |
| <b>CST-0.1</b> | 87.24      | 9.48       | 2.24       | 1.04        |
| <b>CST-0.4</b> | 85.38      | 10.17      | 2.67       | 1.78        |
| <b>CST-1</b>   | 73.74      | 15.17      | 6.22       | 4.86        |

## 8. <sup>31</sup>P MAS NMR deconvolution fittings of the selected CT and CST materials

**Table S3.** Deconvolution parameters obtained from the <sup>31</sup>P NMR spectra given in Figure 7.

| <b>Resonance (<math>\delta_{iso}</math>)</b> | <b>Percentage (%)</b> |
|----------------------------------------------|-----------------------|
| <b>CT-1</b>                                  |                       |
| 48.0 ± 0.20                                  | 4.0                   |
| 57.0 ± 0.30                                  | 12.0                  |
| 65.0 ± 0.02                                  | 24.0                  |
| 73.1 ± 0.05                                  | 30.0                  |
| 86.3 ± 0.06                                  | 28.0                  |
| 100.1 ± 0.30                                 | 2.0                   |
| <b>CST-0</b>                                 |                       |
| 58.0 ± 0.30                                  | 8.0                   |
| 64.0 ± 0.40                                  | 7.0                   |
| 76.0 ± 0.30                                  | 31.0                  |
| 80.0 ± 0.40                                  | 20.0                  |
| 85.0 ± 0.20                                  | 28.0                  |
| 97.0 ± 0.40                                  | 6.0                   |
| <b>CST-0.1</b>                               |                       |
| 48.5 ± 1.00                                  | 8.0                   |
| 61.0 ± 0.02                                  | 56.0                  |
| 72.7 ± 0.08                                  | 8.0                   |
| 81.0 ± 0.23                                  | 27.0                  |
| 97.4 ± 0.50                                  | 1.0                   |
| <b>CST-0.4</b>                               |                       |
| 46.0 ± 1.00                                  | 4.0                   |
| 61.4 ± 0.10                                  | 37.0                  |
| 73.2 ± 0.10                                  | 11.0                  |
| 83.5 ± 0.10                                  | 44.0                  |
| 98.0 ± 0.20                                  | 4.0                   |
| <b>CST-1</b>                                 |                       |
| 48.0 ± 0.40                                  | 1.0                   |
| 61.2 ± 0.30                                  | 9.0                   |
| 76.1 ± 0.30                                  | 26.0                  |
| 88.3 ± 0.02                                  | 58.0                  |
| 100.2 ± 0.10                                 | 6.0                   |

## 9. Catalytic studies

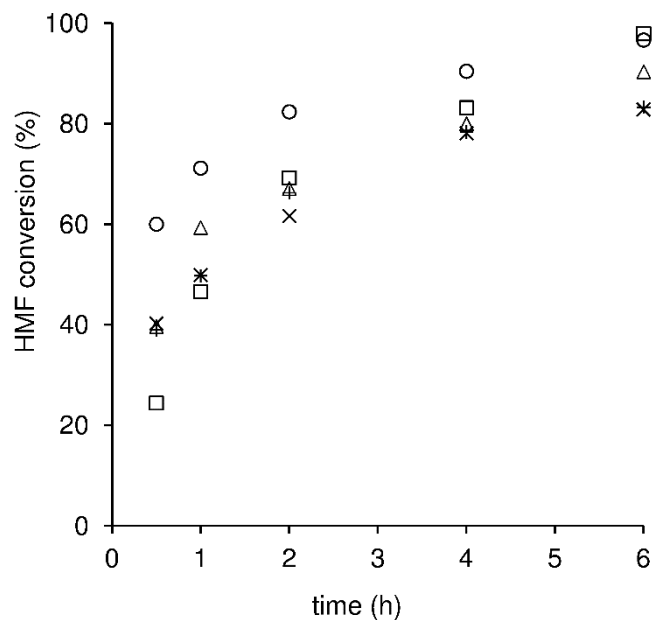

**Figure S9.** Kinetic profiles of the reaction of HMF, in the presence of CST-0.1 (□), CST-0.4 (Δ) or CST-1 (○), CT-1 (+) or Amberlyst-15 (×), using the same initial molar ratio of HMF/AS=50. Reaction conditions:  $[HMF]_0=0.33$  M; 110 °C.



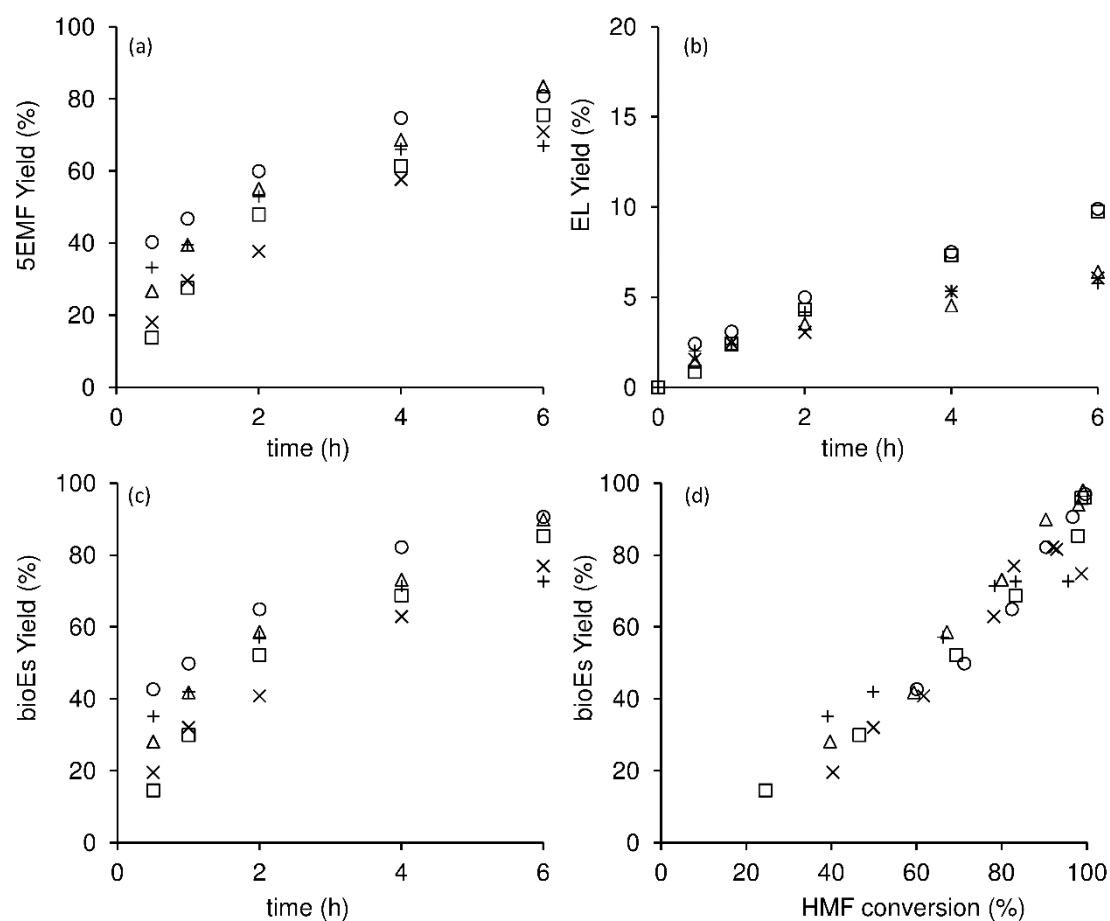

**Figure S10.** Dependence of the yields of (a) 5EMF, (b) EL (+, o, Δ, □) and (c) bioEs yield on reaction time, and (d) bioEs on HMF conversion, in the presence of CST-0.1 (□), CST-0.4 (Δ) or CST-1 (o), CT-1 (+) or Amberlyst-15 (×), using the same initial molar ratio of HMF/AS=50. Reaction conditions:  $[HMF]_0=0.33$  M; 110 °C.

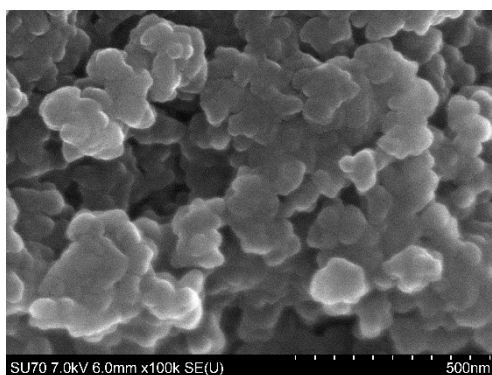

**Figure S11.** SEM image of powdered Amberlyst-15.

**Table S4.** Comparison of the catalytic results for CST-1 to those reported in the literature for various catalysts tested in the reaction of HMF with ethanol.

| Catalyst <sup>a</sup>                                                   | Reaction conditions <sup>b</sup> |                           |                                                     |       | Conv. <sup>c</sup><br>(%) | bioEs yield (%) | Ref. |
|-------------------------------------------------------------------------|----------------------------------|---------------------------|-----------------------------------------------------|-------|---------------------------|-----------------|------|
|                                                                         | T (°C)                           | [HMF] <sub>0</sub><br>(M) | Cat. load<br>(g <sub>cat.</sub> ·dm <sup>-3</sup> ) | t (h) |                           |                 |      |
| CST-1                                                                   | 140                              | 0.33                      | 10                                                  | 1     | 100                       | 96              | -    |
| CST-1                                                                   | 110                              | 0.33                      | 10                                                  | 4     | 99                        | 97              | -    |
| CST-1                                                                   | 110                              | 1.29                      | 20                                                  | 4     | 96                        | 95              | -    |
| S-RGO                                                                   | 140                              | 0.33                      | 10                                                  | 2     | 99                        | 95              | 1    |
| S-RGO                                                                   | 110                              | 0.33                      | 10                                                  | 4     | 98                        | 96              | 1    |
| S-GO                                                                    | 100                              | 0.5                       | 20                                                  | 12    | 96                        | 92              | 3    |
| S-GO                                                                    | 100                              | 0.5                       | 10                                                  | 12    | 85                        | 83              | 3    |
| S-CNT                                                                   | 140                              | 0.33                      | 10                                                  | 24    | 99                        | 86              | 1    |
| S-CB                                                                    | 140                              | 0.33                      | 10                                                  | 24    | 99                        | 85              | 1    |
| Amberlyst-15                                                            | 110                              | 0.33                      | 1.5                                                 | 24    | 92                        | 82              | -    |
| Amberlyst-15                                                            | 110                              | 0.33                      | 10                                                  | 24    | 100                       | 92              | 1    |
| H-beta                                                                  | 110                              | 0.33                      | 10                                                  | 4     | 67                        | 56              | -    |
| Al-TUD-1(21)                                                            | 110                              | 0.3                       | 10                                                  | 4     | 98                        | 96              | 4    |
| Al-MCM-41(25)                                                           | 140                              | 0.7                       | n.m.                                                | 5     | 100                       | 84              | 5    |
| Al-MCM-41(50)                                                           | 140                              | 0.7                       | n.m.                                                | 5     | 100                       | 78              | 5    |
| Al-SBA-15                                                               | 140                              | 0.7                       | n.m.                                                | 5     | 75                        | -               | 5    |
| ZrO <sub>2</sub> /SBA-15                                                | 140                              | 0.7                       | n.m.                                                | 5     | 100                       | 99              | 5    |
| SO <sub>4</sub> <sup>2-</sup> /ZrO <sub>2</sub> /SBA-15                 | 140                              | 0.7                       | n.m.                                                | 5     | 100                       | 97              | 5    |
| SO <sub>3</sub> H-SBA-15                                                | 140                              | 0.12                      | 16                                                  | 24    | ~ 100                     | ~ 85            | 6    |
| HMS-SO <sub>3</sub> H                                                   | 100                              | 0.20                      | 200                                                 | 10    | 95                        | 85              | 7    |
| H-ZSM-5 (11.5)                                                          | 140                              | 0.12                      | 16                                                  | 24    | ~ 100                     | ~ 87            | 6    |
| H-Mordenite(10)                                                         | 140                              | 0.12                      | 16                                                  | 24    | ~ 100                     | ~ 85            | 6    |
| Silica sulfuric acid                                                    | 75                               | 0.39                      | 4.3                                                 | 24    | 100                       | 68              | 8    |
| H-Y                                                                     | 70                               | 0.2                       | 6                                                   | 24    | 10                        | 9               | 9    |
| H <sub>4</sub> SiW <sub>12</sub> O <sub>40</sub> /MCM-41                | 90                               | 1.7                       | 42                                                  | 4     | 92                        | 82              | 10   |
| [MimB(SO <sub>3</sub> H)] <sub>3</sub> PW <sub>12</sub> O <sub>40</sub> | 70                               | 0.2                       | 37.5                                                | 24    | 98                        | 91              | 9    |

<sup>a</sup> Value in parenthesis (when applied) is the Si/Al molar ratio. <sup>b</sup> Reaction conditions: T=reaction temperature (°C), [HMF]<sub>0</sub>=initial molar concentration of HMF, Cat. load=catalyst loading, t=time of reaction (h), n.m.=not mentioned. <sup>c</sup> HMF conversion.

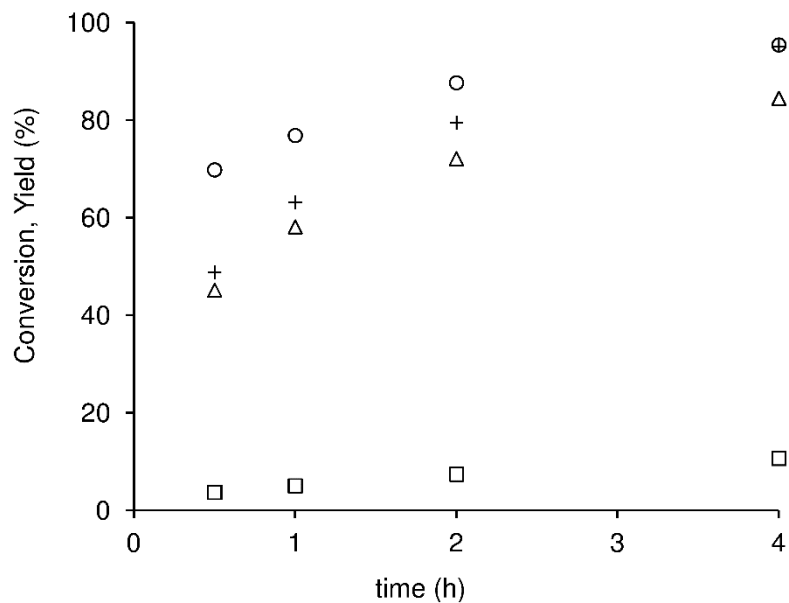

**Figure S12.** Kinetic profiles of HMF conversion (O), and dependence of the yields of 5EMF ( $\Delta$ ), EL ( $\square$ ) and bioEs (+) on reaction time, in the presence of CST-1. Reaction conditions:  $[\text{HMF}]_0=1.29$  M; 10 mg catalyst, 0.5 mL ethanol, 110 °C.

**Table S5.** Reaction of furfuryl alcohol with ethanol in the presence of the CST materials.<sup>a</sup>

| Catalyst <sup>a</sup> | Reaction conditions |       | 2EMF yield <sup>c</sup> (%) | EL yield <sup>c</sup> (%) |
|-----------------------|---------------------|-------|-----------------------------|---------------------------|
|                       | T (°C)              | t (h) |                             |                           |
| CST-0.1               | 110                 | 16/24 | 8/4                         | 77/86                     |
| CST-0.4               | 110                 | 16/24 | 4/1                         | 79/84                     |
| CST-1                 | 110                 | 16    | -                           | 82                        |
| CST-1                 | 140                 | 6     | -                           | 80                        |

<sup>c</sup> FA conversion was always 100%. Reaction conditions:  $[\text{FA}]_0=0.33$  M; catalyst loading=10  $\text{g}_{\text{cat}} \text{dm}^{-3}$ .

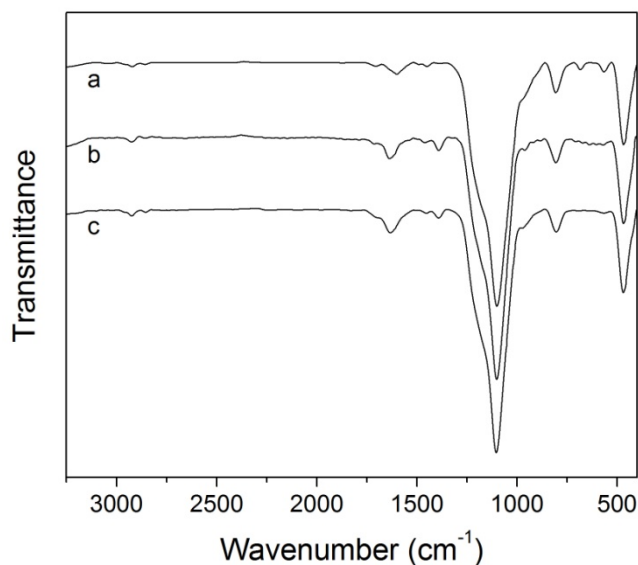

**Figure S13.** FT-IR spectra of a) CST-0, b) CST-0-ET and c) CST-0-WT.

## References

- 1 M. M. Antunes, P. A. Russo, P. V. Wiper, J. M. Veiga, M. Pillinger, L. Mafra, D. V. Evtugin, N. Pinna and A. A. Valente, *ChemSusChem*, 2014, **7**, 804-812.
- 2 S. Stankovich, D. A. Dikin, R. D. Piner, K. A. Kohlhaas, A. Kleinhammes, Y. Jia, Y. Wu, S. T. Nguyen and R. S. Ruoff, *Carbon*, 2007, **45**, 1558-1565.
- 3 H. Wang, T. Deng, Y. Wang, X. Cui, Y. Qi, X. Mu, X. Hou and Y. Zhu, *Green Chem.*, 2013, **15**, 2379-2383.
- 4 P. Neves, M. M. Antunes, P. A. Russo, J. P. Abrantes, S. Lima, A. Fernandes, M. Pillinger, S. M. Rocha, M. F. Ribeiro and A. A. Valente, *Green Chem.*, 2013, **15**, 3367-3376.
- 5 P. Lanzafame, D. M. Temi, S. Perathoner, G. Centi, A. Macario, A. Aloise and G. Giordano, *Catal. Today*, 2011, **175**, 435-441.
- 6 S. Saravanamurugan and A. Riisager, *Catal. Commun.*, 2012, **17**, 71-75.
- 7 B. Liu and Z. Zhang, *RSC Adv.*, 2013, **3**, 12313-12319.
- 8 M. Balakrishnan, E. R. Sacia and A. T. Bell, *Green Chem.*, 2012, **14**, 1626-1634.
- 9 L. Bing, Z. Zhang and K. J. Deng, *Ind. Eng. Chem. Res.*, 2012, **51**, 15331-15336.
- 10 P. Che, F. Lu, J. Zhang, Y. Huang, X. Nie, J. Gao and J. Xu, *Bioresour. Technol.*, 2012, **119**, 433-436.
